# Supplementary material for: Methanogenic Biodegradation of iso-Alkanes by Indigenous Microbes from Two Different Oil Sands Tailings Ponds
Source: MDPI journal article supplement (doi:10.3390/microorganisms9081569), 2021-07-23
Supplement: s1 [file s1]

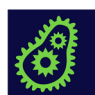

SUPPLEMENTARY MATERIALS FOR

# Methanogenic Biodegradation of *iso*-Alkanes by Indigenous Microbes from Two Different Oil Sands Tailings Ponds

Mohd Faidz Mohamad Shahimin <sup>1,†</sup>, Julia M. Foght <sup>2</sup> and Tariq Siddique <sup>1,\*</sup><sup>1</sup> Department of Renewable Resources, University of Alberta, Edmonton, AB T6G 2G7, Canada<sup>2</sup> Department of Biological Sciences, University of Alberta, Edmonton, AB, T6G 2E9, Canada

\* Correspondence: tariq.siddique@ualberta.ca

† Current Address: Department of Chemical Engineering Technology, Universiti Malaysia Perlis, Padang Besar, 02100 Perlis, Malaysia.

The supplementary materials contain 1 figure (Figure S1) and 2 tables (Table S1 and S2).

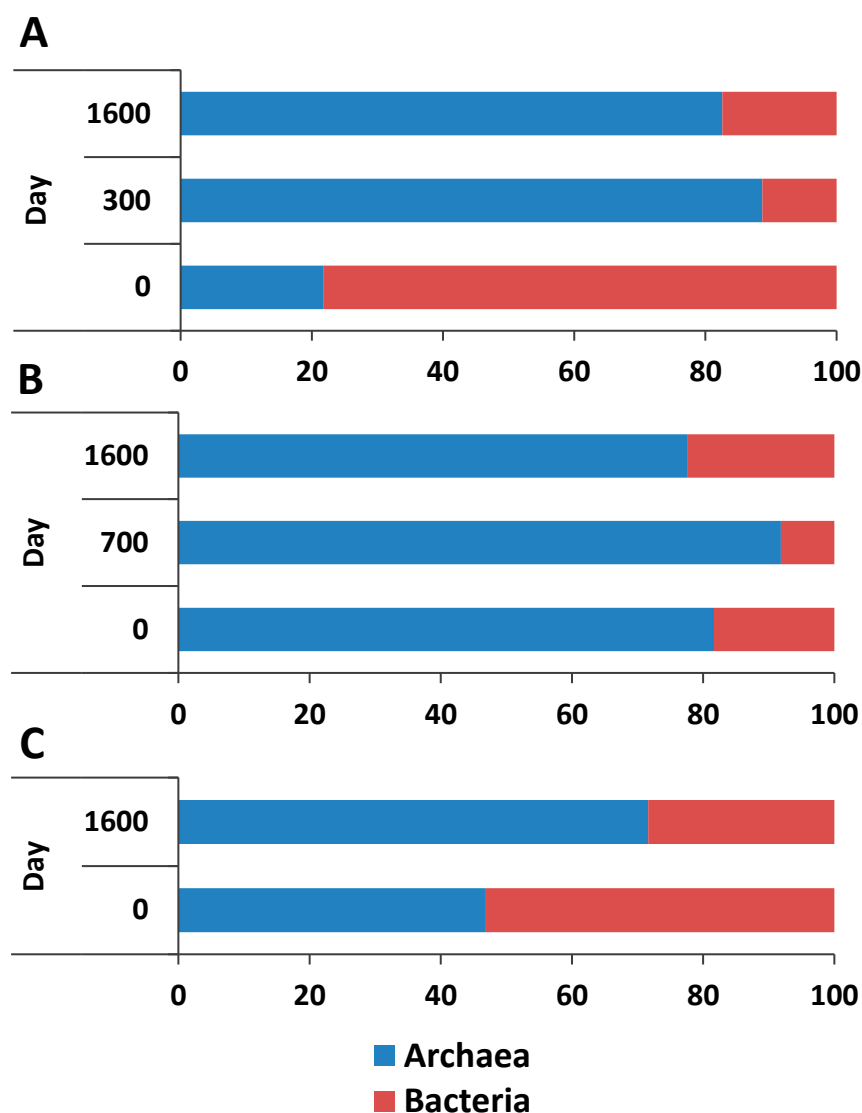

**Figure S1.** Archaeal and bacterial reads expressed as a proportion of total quality-controlled prokaryotic reads, based on analysis of partial 16S rRNA gene pyrosequences before and during incubation of MFT with *iso*-alkanes mixtures. **(A)** CNUL MFT amended with M-3I; **(B)** CNRL MFT amended with M-3I; and **(C)** CNRL MFT amended with M-5I. The results represent pooled amplicons of triplicate cultures.

**Table S1.** Relative abundance of bacterial 16S rRNA gene pyrosequences, grouped at class level, in CNUL and CNRL MFT incubated with mixtures of either three or five *iso*-alkanes (M-3I or M-5I) under methanogenic conditions. Analyses were performed on MFT before degradation (day 0) and after incubation times indicated in days. Genus assignments are shown where confident. “Others <5%” is the sum of all taxa individually abundant at <5% of the total bacterial reads in a given sample.

| Nomenclature                                                                 | CNUL |      |      | CNRL |      |      |      |      |
|------------------------------------------------------------------------------|------|------|------|------|------|------|------|------|
|                                                                              | M-3I |      |      | M-3I |      |      | M-5I |      |
|                                                                              |      |      |      | Day  |      |      |      |      |
|                                                                              | 0    | 300  | 1600 | 0    | 700  | 1600 | 0    | 1600 |
| <b>Actinobacteria</b>                                                        |      |      |      |      |      |      |      |      |
| <i>Coriobacteriales</i> ; <i>Coriobacterineae</i> ; <i>Coriobacteriaceae</i> | 0.1  | 1.0  | 1.0  | 11.3 | 1.4  | 1.7  | 4.9  | 0.2  |
| <b>Anaerolineae</b>                                                          |      |      |      |      |      |      |      |      |
| <i>Anaerolineales</i> ; <i>Anaerolineaceae</i> ; <i>Leptolinea</i>           | 0.6  | 5.1  | 3.5  | 3.6  | 2.8  | 1.2  | 7.2  | 1.6  |
| <i>Anaerolineales</i> ; <i>Anaerolineaceae</i> ; uncultured                  | 0.4  | 7.2  | 12.2 | 10.3 | 2.8  | 4.0  | 13.8 | 2.7  |
| <b>Clostridia</b>                                                            |      |      |      |      |      |      |      |      |
| <i>Clostridiales</i> ; Family XI Incertae Sedis                              | 0.0  | 0.0  | 6.2  | 0.4  | 0.7  | 2.9  | 0.3  | 0.1  |
| <i>Clostridiales</i> ; <i>Peptococcaceae</i>                                 | 0.2  | 60.8 | 14.1 | 3.6  | 76.6 | 21.0 | 2.6  | 0.0  |
| <b>Betaproteobacteria</b>                                                    |      |      |      |      |      |      |      |      |
| <i>Burkholderiales</i> ; <i>Comamonadaceae</i>                               | 0.1  | 0.0  | 1.8  | 0.2  | 0.0  | 4.7  | 8.9  | 0.3  |
| <i>Hydrogenophilales</i> ; <i>Hydrogenophilaceae</i> ; <i>Thiobacillus</i>   | 93.8 | 0.0  | 1.3  | 0.3  | 0.7  | 1.8  | 0.1  | 0.0  |
| <i>Rhodocyclales</i> ; <i>Rhodocyclaceae</i>                                 |      |      |      |      |      |      |      |      |
| <i>Rhodocyclales</i> ; <i>Rhodocyclaceae</i> ; uncultured                    | 0.0  | 0.0  | 2.3  | 8.9  | 0.0  | 4.0  | 4.5  | 0.1  |
| <b>Deltaproteobacteria</b>                                                   |      |      |      |      |      |      |      |      |
| <i>Syntrophobacteriales</i> ; <i>Syntrophaceae</i> ; <i>Smithella</i>        | 0.0  | 1.0  | 0.5  | 9.7  | 1.4  | 1.8  | 8.5  | 86.1 |
| <b>Gammaproteobacteria</b>                                                   |      |      |      |      |      |      |      |      |
| <i>Pseudomonadales</i> ; <i>Pseudomonadaceae</i> ; <i>Pseudomonas</i>        | 0.6  | 0.0  | 12.9 | 0.1  | 0.0  | 5.6  | 0.2  | 0.1  |
| <b>Spirochaetes</b>                                                          |      |      |      |      |      |      |      |      |
| <i>Spirochaetales</i> ; <i>Spirochaetaceae</i> ; uncultured                  | 0.0  | 2.1  | 1.0  | 3.4  | 0.0  | 1.3  | 8.0  | 0.4  |
| <b>Others (&lt;5%)</b>                                                       | 4.1  | 22.7 | 43.3 | 48.2 | 13.5 | 50.1 | 40.9 | 8.3  |

**Table S2.** Relative abundance of archaeal 16S rRNA gene pyrosequences, grouped at class level, in CNUL and CNRL MFT incubated with mixtures of either three or five *iso*-alkanes (M-3I or M-5I) under methanogenic conditions. Analyses were performed on MFT before degradation (day 0) and after incubation times indicated. Genus assignments are shown where confident. “Others <5%” is the sum of all taxa individually abundant at <5% of the total archaeal reads in a given sample.

| Nomenclature                                         | CNUL |      |      | CNRL |      |      |      |      |
|------------------------------------------------------|------|------|------|------|------|------|------|------|
|                                                      | M-3I |      |      | M-3I |      |      | M-5I |      |
|                                                      |      |      |      | Day  |      |      |      |      |
|                                                      | 0    | 300  | 1600 | 0    | 700  | 1600 | 0    | 1600 |
| <b>Methanobacteriales</b>                            |      |      |      |      |      |      |      |      |
| <i>Methanobacteriaceae</i> ; <i>Methanobacterium</i> | 8.5  | 0.0  | 0.4  | 0.4  | 0.0  | 29.7 | 0.6  | 0.2  |
| <b>Methanomicrobiales</b>                            |      |      |      |      |      |      |      |      |
| <i>Methanoregula</i>                                 | 3.9  | 17.6 | 31.7 | 61.5 | 86.1 | 37.3 | 84.5 | 21.0 |
| <i>Methanolinea</i>                                  | 8.9  | 37.6 | 0.6  | 0.0  | 0.1  | 0.0  | 0.0  | 0.0  |
| <b>Methanosarcinales</b>                             |      |      |      |      |      |      |      |      |
| <i>Methanosaetaceae</i> ; <i>Methanosaeta</i>        | 64.1 | 43.9 | 27.7 | 33.3 | 10.5 | 4.0  | 6.9  | 75.2 |
| <i>Methanosarcinaceae</i> ; <i>Methanosarcina</i>    | 11.2 | 0.4  | 35.4 | 0.3  | 0.3  | 26.3 | 0.2  | 0.0  |
| <b>Others (&lt;5%)</b>                               | 3.3  | 0.4  | 4.2  | 4.4  | 3.0  | 2.7  | 7.9  | 3.6  |
